# Supplementary material for: Genetic Engineering of Agrobacterium Increases Curdlan Production through Increased Expression of the crdASC Genes
Source: MDPI journal article supplement (doi:10.3390/microorganisms12010055), 2023-12-28
Supplement: s1 [file s1]

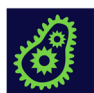

## Article

# Supplementary Data for Genetic Engineering of *Agrobacterium* increases Curdlan Production through Increased Expression of the *crdASC* Genes

Matthew McIntosh

Institute of Microbiology and Molecular Biology, IFZ, Justus-Liebig-Universität, 35292, Giessen, Germany; matthew.mcintosh@mikro.bio.uni-giessen.de

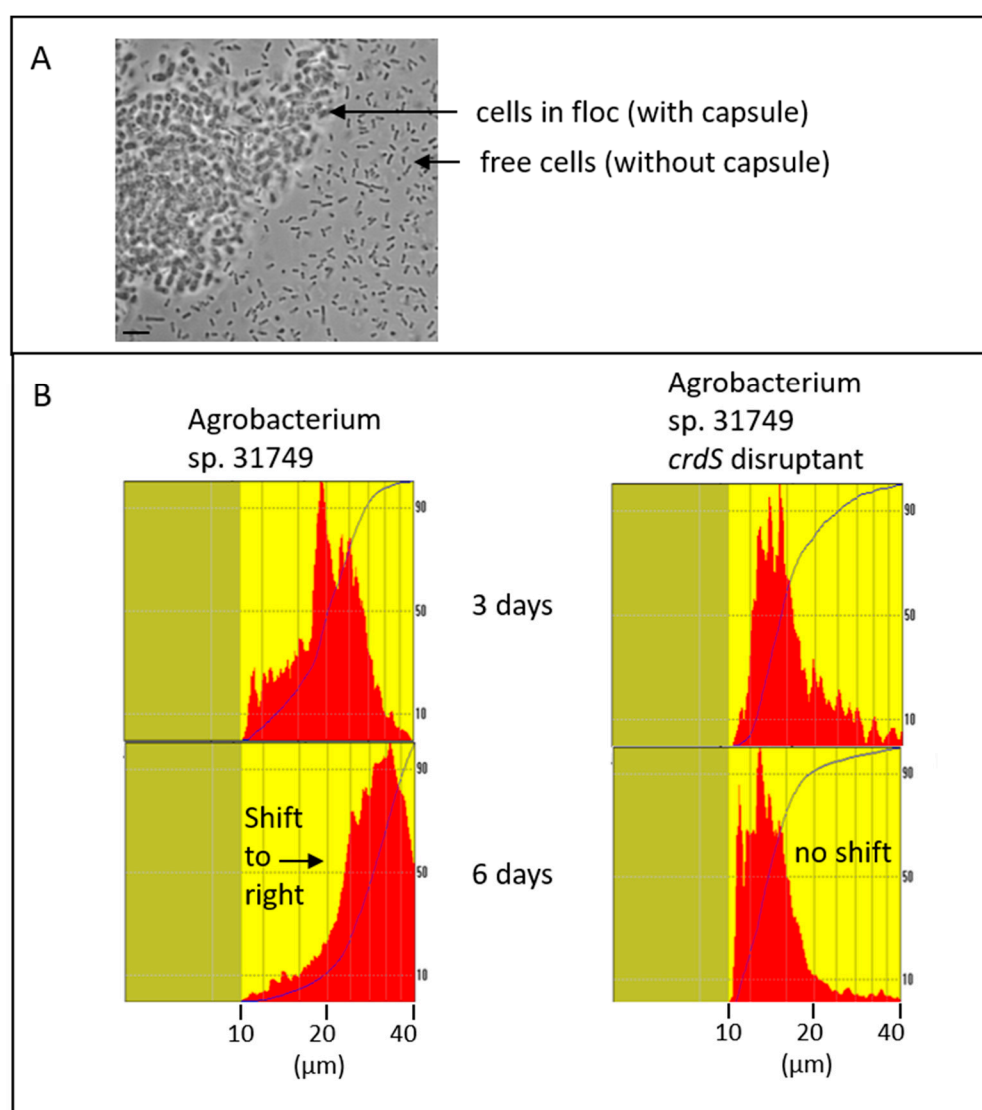

**Figure S1.** Curdlan promotes cell aggregation. (A) In liquid cultures of *Agrobacterium* defined broth (ADB), encapsulated cells form cell aggregates/flocs, while non-capsulated cells remain free and unattached. Bar represents 5  $\mu\text{m}$ . (B) Liquid cultures were analysed using a particle counter with a 10–40  $\mu\text{m}$  cutoff. The average size of the particles/flocs from the curdlan producing strain were clearly larger and shifted to right (compare 3 days and 6 days), while the particles from the *crdS* disruptant did not.

**Supplementary File S1.** The DNA sequences of the suicide plasmids used in this study.**primers and plasmids used in this study**

| <u>construct name</u> | <u>primer name</u> | <u>primer sequence</u>                 | <u>application</u>                  |  |
|-----------------------|--------------------|----------------------------------------|-------------------------------------|--|
| pKPcrdA-mV            | PcrdA-384H-fwd     | cataagcttAGTTTTGGGAAAAAGCAACGG         | suicide plasmid 1                   |  |
|                       | PcrdA+51X-rev      | atgtctagaTCTTACGGATGCGCCTTAT           | (PCR for Pcrd)                      |  |
|                       |                    |                                        |                                     |  |
| pK18-crdA KO          | crdA-rbs-sal-fwd   | atatgtcgacaacagaggagttgatttcATGctgttcc | suicide plasmid 2                   |  |
|                       | crdA+489x-rev      | tatatctagagacgagttttgttgcgagccg        | (PCR for <i>crdA</i> fragment)      |  |
|                       |                    |                                        |                                     |  |
| pK-PphaP-crdA         | PphaP-134-H-fwd    | catacaagcttGCAACGCAAGGCGTTTCGGG        | suicide plasmid 3                   |  |
|                       | PphaP-ts-Sal-rev   | catagtcgacTCTCCTGCGAGCGGGCTCAT         | (PCR for PphaP)                     |  |
|                       | crdA-rbs-sal-fwd   | atatgtcgacaacagaggagttgatttcATGctgttcc |                                     |  |
|                       | crdA+489x-rev      | tatatctagagacgagttttgttgcgagccg        | (PCR for <i>crdA</i> fragment)      |  |
|                       |                    |                                        |                                     |  |
| pPHU-Pcrd::mVenus     | PcrdA-384H-fwd     | cataagcttAGTTTTGGGAAAAAGCAACGG         | reporter plasmid                    |  |
|                       | PcrdA+51X-rev      | atgtctagaTCTTACGGATGCGCCTTAT           | (PCR for Pcrd)                      |  |
|                       |                    |                                        |                                     |  |
| pPHU-PphaP::mVenus    | P0381-H-fwd2       | gataaagcttAATACGGCCATTACACCAAC         | reporter plasmid                    |  |
|                       | P0381-X-rev2       | catatctagaGTCCTGCATCACTTTGCTG          | PCR for PphaP, 0381 = <i>phaP</i> ) |  |
|                       |                    |                                        |                                     |  |
|                       | mVenus-E-rev       | catgaattcTACTTGTACAGCTCGTCCATGC        | reporter, mVenus gene               |  |
|                       | mVenus-X-fwd       | tcattctagaATGGTGAGCAAGGGCGAGGAGCT      | (PCR for mVenus)                    |  |
|                       |                    |                                        |                                     |  |
| pK18-crdS KO          | CRDS1.2            | CGGGATCCTCTAGACGACTTCATCATGGTCTC       | suicide plasmid                     |  |
|                       | CRDS5.2.2          | CGGGATCCTCTAGACCATCAGGCGATATGTCAG      | (PCR for <i>crdS</i> fragment)      |  |

## DNA sequences relevant for suicide and reporter plasmids

Colour coded key:

Vector sequence (pK18mob2)

*crdA* fragment

PcrdA fragment

mVenus sequence

PphaP

atg =start codon of *crdA*

various restriction digest sites

&gt; pK18PcrdA-mV, Suicide plasmid 1 (reporter plasmid for 31749)

ACGACGGCCAGTGCC **AAGCTT**AGTTTGGGAAAAAGCAACGGCACTTCCATACCGACTT  
 GAGGCGCTAACGCGCTTGCAGTCTGGAATTGACCTACCCGGCGGCTAGGTCTTTGCGACG  
 GCATGCCGTCGCCCCCATAAGTTGCATATGCGAAATGGCGAAGCCAGGGTGTGTTTCCA  
 AGCACGCCATTTAAAAGGCAATTCTAATATGAAACGATTGAAATTTCTGCTTTCAAATTC  
 TCTTCGATGAATTTTCGCGTCCCCAAAATCGTCAGATGCCTATTTGTTGGTCAAAATTGGA  
 AAATTAGTTAATGCAATTTTACTATGTTGCGGCGCACAAGAACTTCATTACCATTTCAA  
 TACTGCGGGAGGAACGGTTTCTCAACAACAGAGGAGTTGATTT**atg**CTGTTCCGCAATAA  
 GCCTGACGCAAAATATAAAGGCGCATCCGTAAGA **TCTAGA**ATGGTGAGCAAGGGCGAG  
 GAGCTGTTACCGGGGTGGTGCCCATCCTGGTCGAGCTGGACGGCGACGTAAACGGCCA  
 CAAGTTCAGCGTGTCCGGCGAGGGCGAGGGCGATGCCACCTACGGCAAGCTGACCCTGA  
 AGCTGATCTGCACCACCGCAAGCTGCCCCGTGCCCTGGCCACCCTCGTGACCACCCTGG  
 GCTACGGCCTGCAGTGCTTCGCCCCGTACCCCGACCACATGAAGCAGCACGACTTCTTCA  
 AGTCCGCCATGCCCGAAGGCTACGTCCAGGAGCGCACCATCTTCTTCAAGGACGACGGC  
 AACTACAAGACCCGCGCCGAGGTGAAGTTCGAGGGCGACACCCTGGTGAACCGCATCG  
 AGCTGAAGGGCATCGACTTCAAGGAGGACGGCAACATCCTGGGGCACAAGCTGGAGTA  
 CAACTACAACAGCCACAACGTCTATATCACCGCCGACAAGCAGAAGAACGGCATCAAG  
 GCCAACTTCAAGATCCGCCACAACATCGAGGACGGCGGCGTGCAGCTCGCCGACCACTA  
 CCAGCAGAACACCCCCATCGGCGACGGCCCCGTGCTGCTGCCCCGACAACCACTACCTGA  
 GCTACCAGTCCAAACTGAGCAAAGACCCCAACGAGAAGCGCGATCACATGGTCTCTGCTG  
 GAGTTCGTGACCGCCGCGGGATCACTCTCGGCATGGACGAGCTGTACAAGTAA**GAATT**  
**GTA**

&gt; pK18PcrdA-mV, Suicide plasmid 1 (reporter plasmid for C58)

ACGACGGCCAGTGCC **AAGCTT**AGTTTGGGAAAAAGCAACGGCACTTCCATACCGACTT  
 GAGGCGCTAACGCGCTTGCAGTCTGGAATTGACCTACCCGGCGGCGAGGCCTTTGCGAC  
 GGCATGCCGTCGCCCCCATAAGTTGCATATGCGAAATGGCGAAGCCAGGGTGTGTTTCC  
 AAGCACGCCATTTAAAAGGCAATTCTAATATGAAACGATTGAAATTTCTGCTTTCAAATT  
 CTCTTCGATGAATTTTCGCGTCCCCAAAATCGTCAGATGCCTATTTGTTGGTCAAAATTGG  
 AAAATTAGTTAATGCAATTTTACTATGTTGCGGCGCACAAGAACTTCATTACCATTTCA  
 ATaCTGCGGGAGGAACGGTTTCTCAACAACAGAGGAGTTGATTT**atg**CTGTTCCGCAATA  
 AGCCTGACGCAAAATATAAAGGCGCATCCGTAAGA **TCTAGA**ATGGTGAGCAAGGGCGA  
 GGAGCTGTTACCGGGGTGGTGCCCATCCTGGTCGAGCTGGACGGCGACGTAAACGGCC  
 ACAAGTTCAGCGTGTCCGGCGAGGGCGAGGGCGATGCCACCTACGGCAAGCTGACCCTG  
 AAGCTGATCTGCACCACCGCAAGCTGCCCCGTGCCCTGGCCACCCTCGTGACCACCCTG  
 GGCTACGGCCTGCAGTGCTTCGCCCCGTACCCCGACCACATGAAGCAGCACGACTTCTTC  
 AAGTCCGCCATGCCCGAAGGCTACGTCCAGGAGCGCACCATCTTCTTCAAGGACGACGG  
 CAACTACAAGACCCGCGCCGAGGTGAAGTTCGAGGGCGACACCCTGGTGAACCGCATCG  
 AGCTGAAGGGCATCGACTTCAAGGAGGACGGCAACATCCTGGGGCACAAGCTGGAGTA  
 CAACTACAACAGCCACAACGTCTATATCACCGCCGACAAGCAGAAGAACGGCATCAAG  
 GCCAACTTCAAGATCCGCCACAACATCGAGGACGGCGGCGTGCAGCTCGCCGACCACTA  
 CCAGCAGAACACCCCCATCGGCGACGGCCCCGTGCTGCTGCCCCGACAACCACTACCTGA  
 GCTACCAGTCCAAACTGAGCAAAGACCCCAACGAGAAGCGCGATCACATGGTCTCTGCTG

GAGTTCGTGACCGCCGCCGGGATCACTCTCGGCATGGACGAGCTGTACAAGTAA GAATT  
CGTA

>pK18-crdA KO, Suicide plasmid 2 (KO plasmid for C58)

ACGACGGCCAGTGCC AAGCTT GCATGCCTGCAG GTCGAC AACAGAGGAGTTGATTTCatg  
CTGTTCCGCAATAAGCCTGACGCAAAATATAAAGGCGCATCCGTAAGATTAGCCTCCTAT  
ACTGTTCTCGGTGTGGTGGCGACGGTGTCTTCTTCTCCGTGTTCCGCCTGTATTACCTC  
TCAAACGAGCCGTGCTCTGATCAATGCCCCATTATTCCCTTGACGACGCCGATCAGCGG  
CGTTGTGAAAACATCGAACGACAGGGGCGGTGCCACCATCGAGAACGACAAGGTGGAC  
AATACAACGCTGATCGGCCTGAAGGTTCAACTGGCGGCGCTTGACAATGAGATGCGCCA  
GAAGAACTCGATCGTTTCGGACTATGCCTCGCGGATCGACGACCTGAACAGGGATCTTTC  
CAGCCAGCAGGCGGCTTTGCTGCTGCGGACAGAGTCCGATCTCGAGGCTGCAGAGGCGG  
CCTTGAGATGGTTACCTATTCCACGCGGATCGAAAAGCCGAAGCGGCTCGCAAACAA  
AAACTCGTCTCTAGAGGATCCCCGGGTACCGAGCTC GAATTC GTA

>pK18-PphaP-crdA, Suicide plasmid 3 (over-expression plasmid for 31749)

AAGCTT GCAACGCAAGGCGTTTCGGGCCAGGTGCGAAAAAATGCTGCGGTGCAGAATGA  
GCGGTTGATTTCTGCGGCGCAGCATTATATCCTTGTCACAGGATAACCGGGCATGAGC  
CCGCTCGCAGGAGAGTCTGAC AACAGAGGAGTTGATTTCatgCTGTTCCGCAATAAGCCTG  
ACGCAAAATATAAAGGCGCATCCGTAAGATTAGCCTCCTATACTGTTCTCGGTGTGGTGG  
CGACGGTGTCTTCTTCTCCGTGTTCCGCCTGTATTACCTCTCAAACGAGCCGTGCTCTG  
ATCAATGCCCCATTATTCCCTTGACGACGCCGATCAGCGGCGTTGTGAAAACATCGAAC  
GACAGGGGCGGTGCCACCATCGAGAACGACAAGGTGGACAATACAACGCTGATCGGCC  
TGAAGGTTCAACTGGCGGCGCTTGACAATGAGATGCGCCAGAAGAACTCGATCGTTTCG  
GACTATGCCTCGCGGATCGACGACCTGAACAGGGATCTTTCAGCCAGCAGGCGGCTTT  
GCTGCTGCGGACAGAGTCCGATCTCGAGGCTGCAGAGGCGGCTTGCAGATGGTTACCT  
ATTCCACGCGGATCGAAAAGCCGAAGCGGCTCGAAACAAAAACTCGTCTCTAGAGG  
ATCCCCGGGTACCGAGCTC GAATTC GTA

**Disclaimer/Publisher's Note:** The statements, opinions and data contained in all publications are solely those of the individual author(s) and contributor(s) and not of MDPI and/or the editor(s). MDPI and/or the editor(s) disclaim responsibility for any injury to people or property resulting from any ideas, methods, instructions or products referred to in the content.
